# Supplementary material for: 15LO1 dictates glutathione redox changes in asthmatic airway epithelium to worsen type 2 inflammation
Source: JCI journal article supplement (doi:10.1172/jci151685), 2021-11-11
Supplement: sd1 [file 1]

## カタログ

|                               |   |
|-------------------------------|---|
| R2 supplementary Figures..... | 1 |
| R2 supplemental clean.....    | 5 |

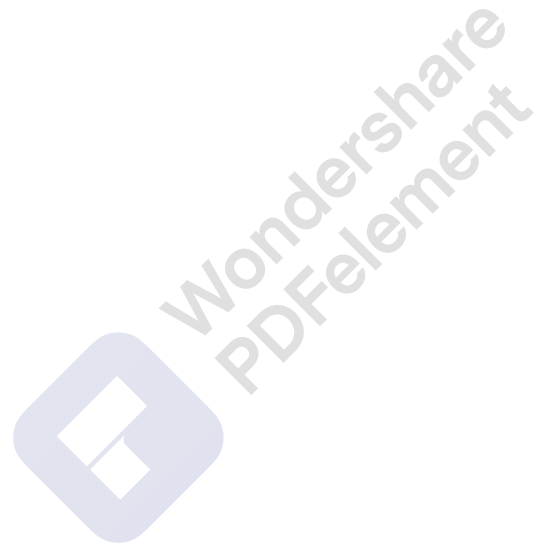

# Supplemental Figure 1

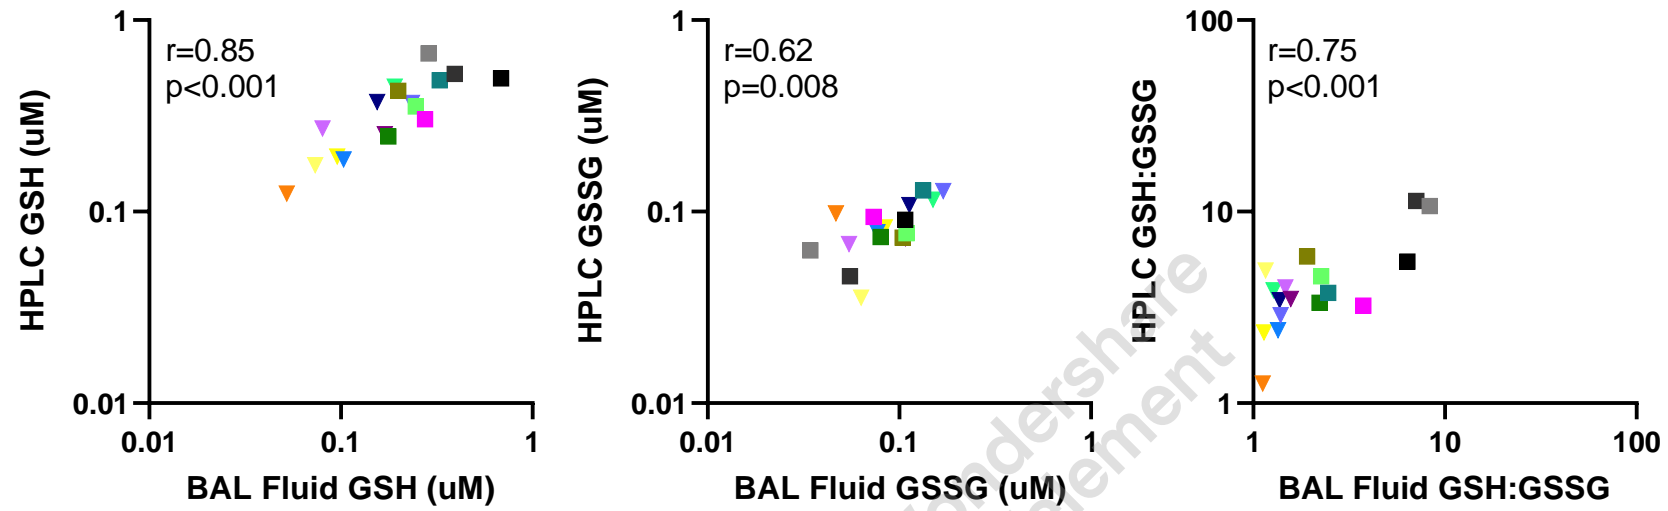

Fig. 1. GSH and GSSG levels and GSH:GSSG measured by enzymatic method correlated strongly with high-performance liquid chromatography (HPLC) measurements (n=17).

Supplemental Figure 2.

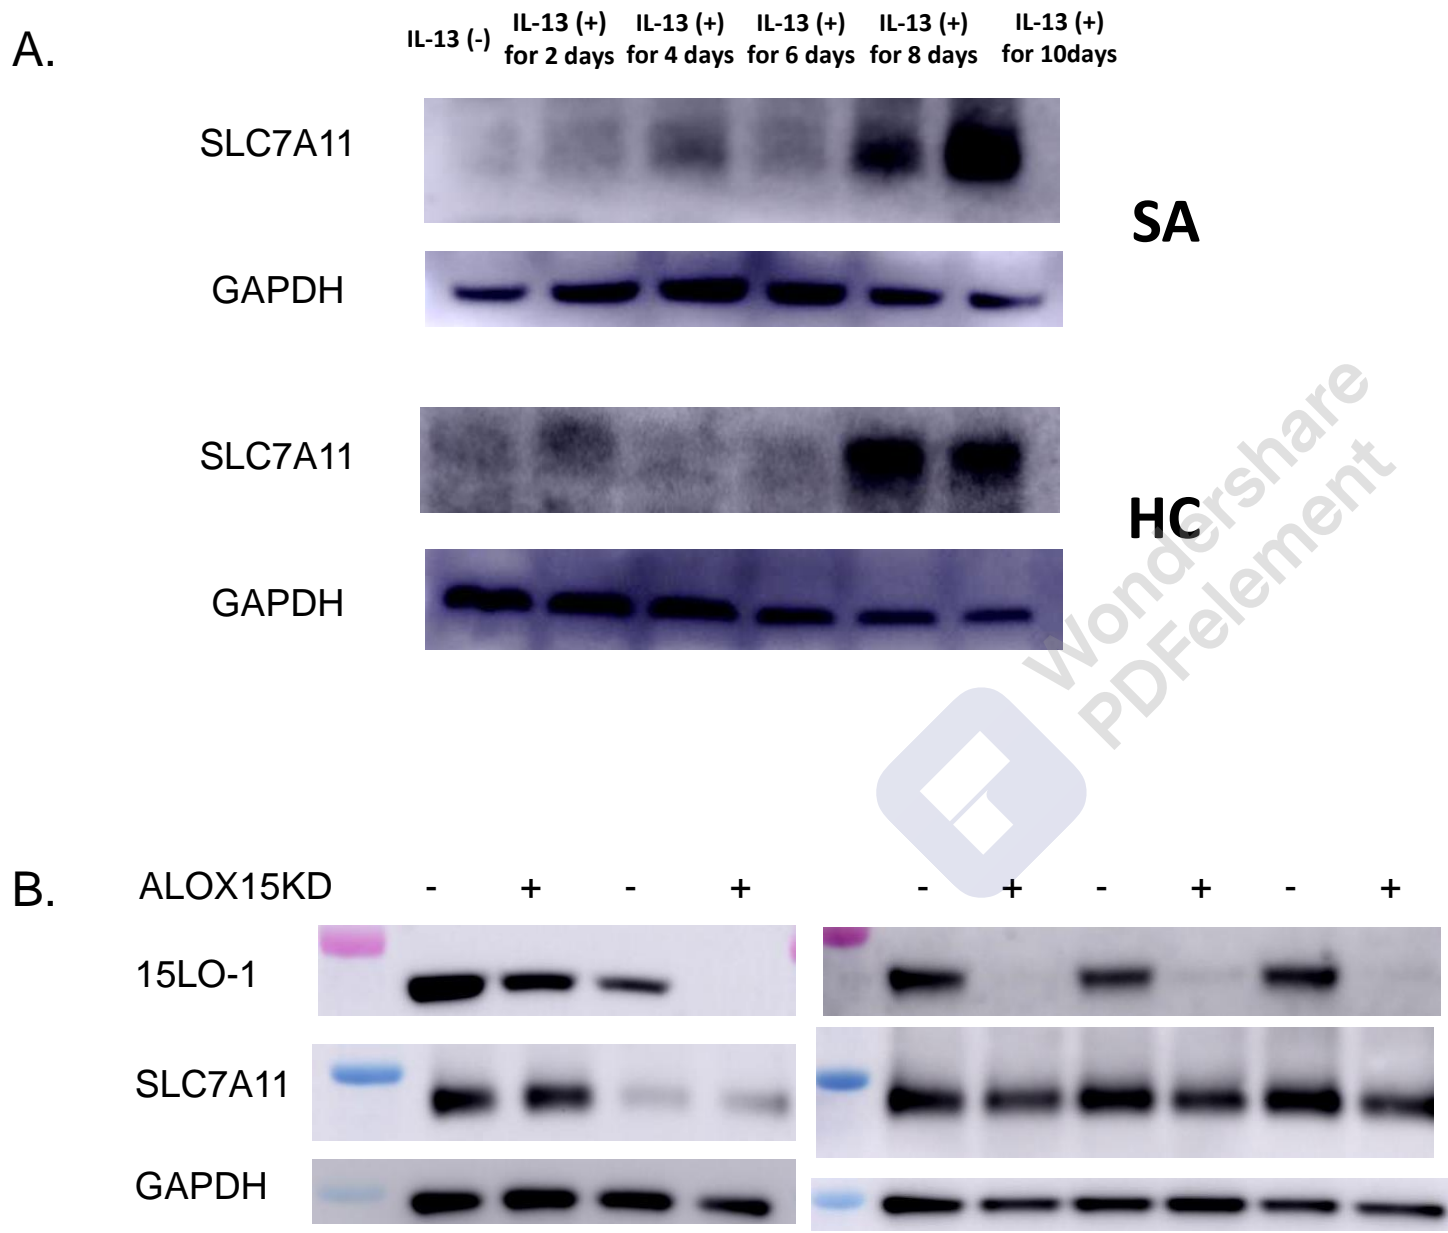

**Fig. 2. (A)** Representative western blots showing time course of SLC7A11 protein expression in response IL-13 stimulation *in vitro*. **(B)** Representative western blots showing the inconsistent impact of ALOX15 siRNA knockdown on SLC7A11. **(C)** Densitometric analysis of the fold changes.

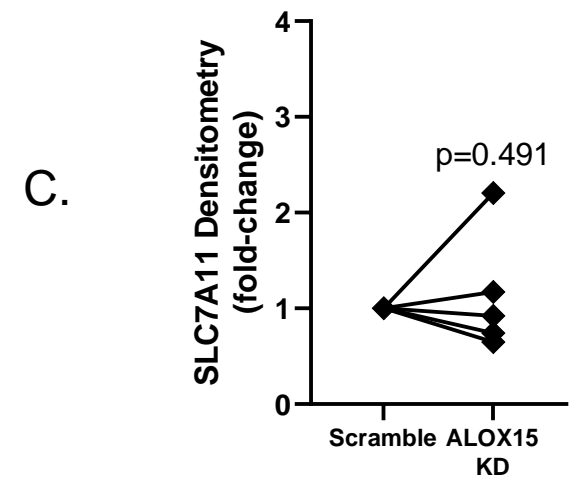

### Supplemental Figure 3.

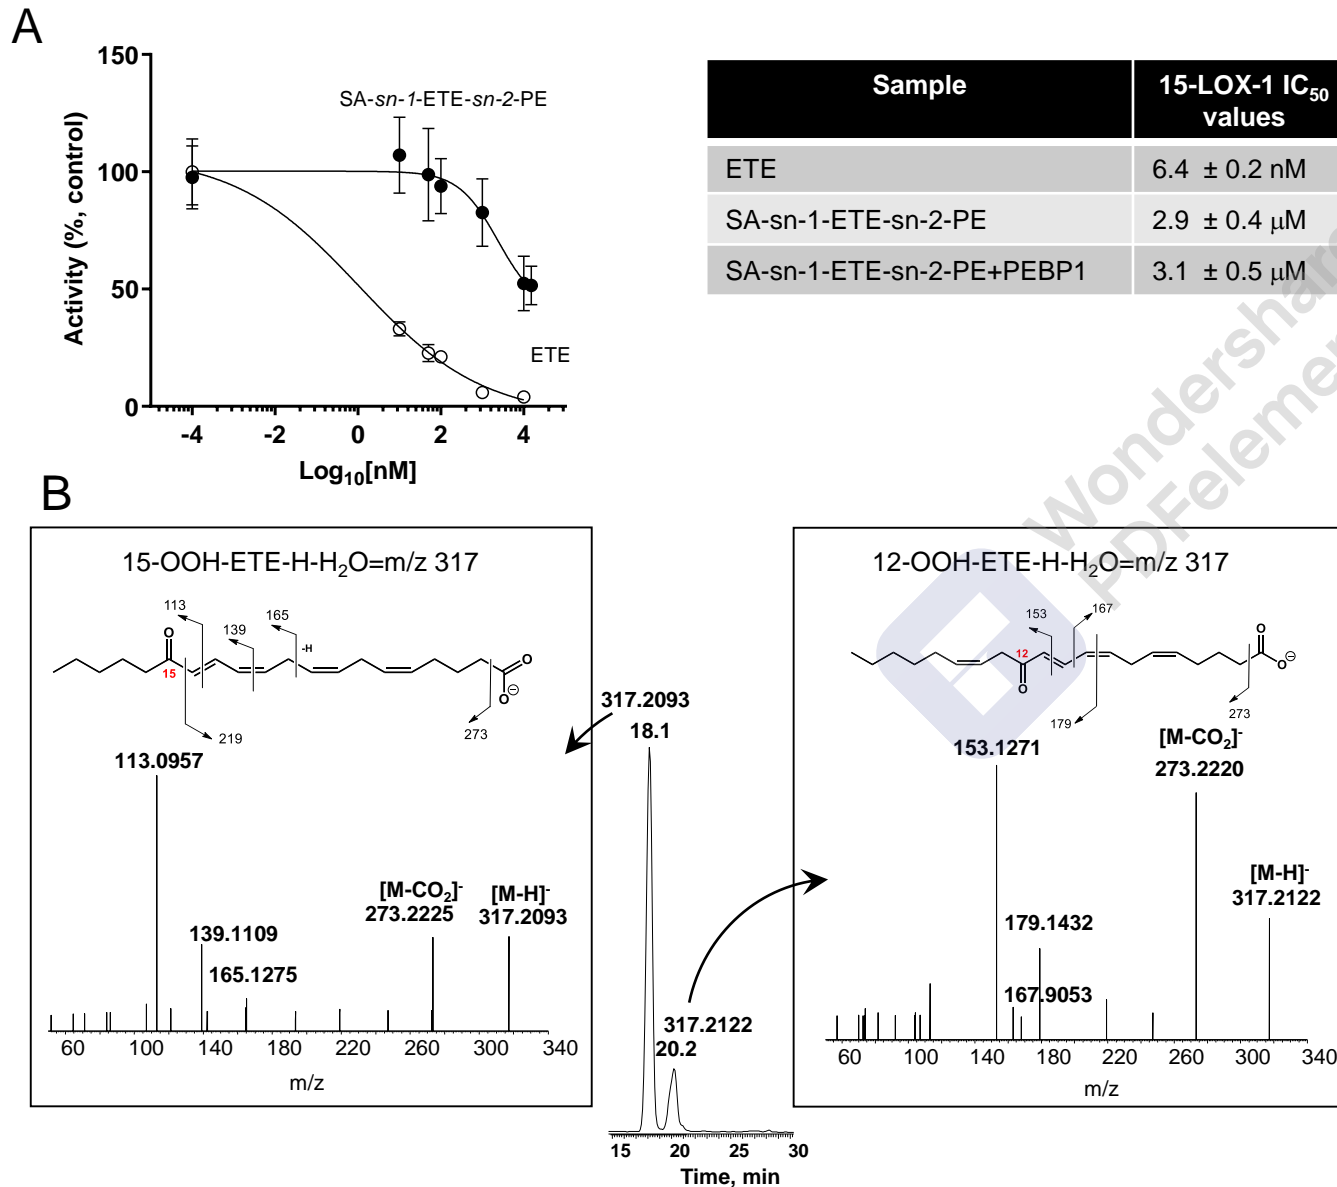

**Fig 3.** Effect of BLX2477 on oxidation of free eicosanotetraenoic acid (ETE) and stearoyl-sn-1-eicosatetraenoyl-sn-1-phosphatidylethanolamine (SA-sn-1-ETE-sn-2-PE) by 15-LOX-1 in the absence and in the presence of PEBP1.

(A) Concentration dependent inhibition of 15LO1 activity by BLX2477 in the presence of ETE (open circles) or in the presence of SA-sn-2-ETE-sn-2-PE (closed circles) (left panel). The data are presented as % of control. 100% of 15LO1 activity in the absence of BLX2477 was used as the control (n=5-7). IC<sub>50</sub> values of 15LO1 for BLX2477. IC<sub>50</sub> values were calculated using GraphPad Prism (GraphPad Software, Inc.)

(B) 15LO1 oxidation of ETE results in the formation of two oxidized products 15-OOH-ETE and 12-OOH-ETE. Base peak profile of oxygenated ETE formed during 15LO1-driven reaction (middle panel). MS<sup>2</sup> spectrum and structural formulas showing the fragments formed during the analysis of molecular ions with m/z 317.2 corresponding to 15-OOH-ETE without water (left panel) and 12-OOH-ETE without water (right panel).

Experimental conditions: ETE or SA-sn-1-ETE-sn-2-PE were integrated into OA-sn-1-OA-sn-2-PC (100 mM, at ratio of 1:1) liposomes and incubated with 15LO1 (0.4mM) for 2.5 and 5 min at 37°C. Reaction was started by the addition of 3 μM 13 HpODE. At the end of incubation lipids were extracted and analyzed by LC/MS.

# Supplemental Figure 4.

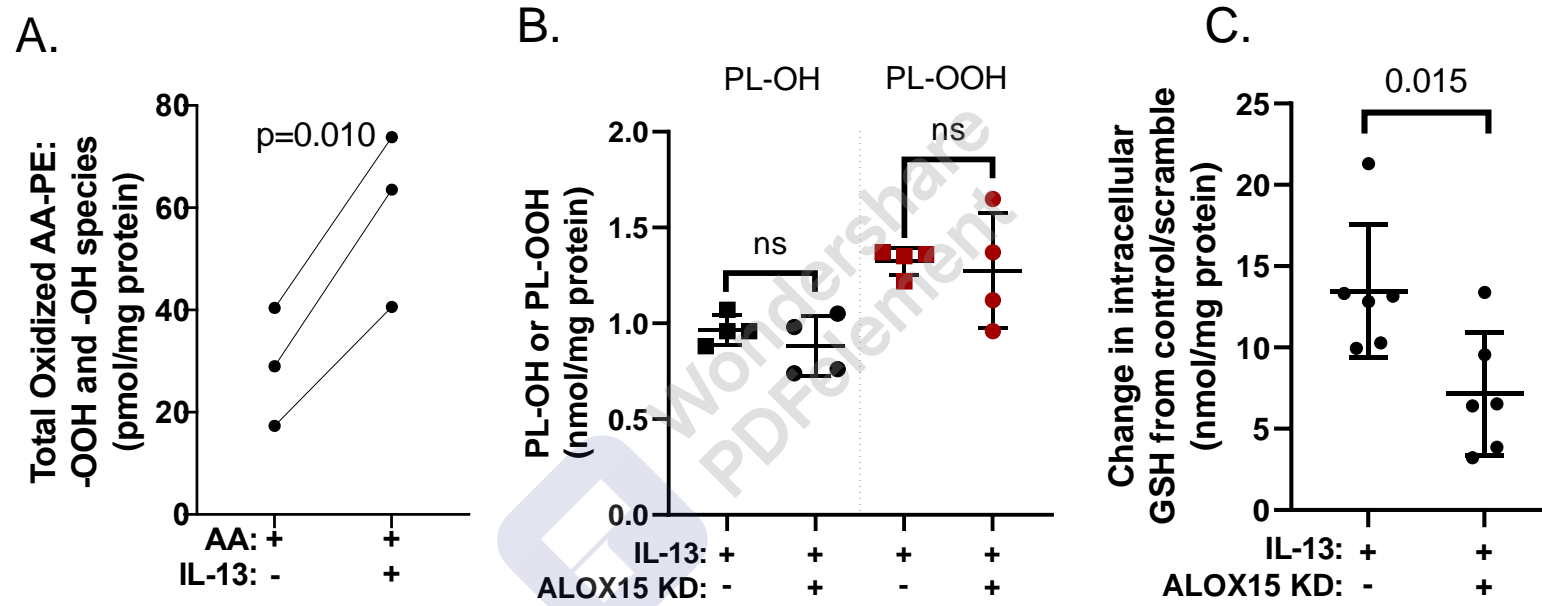

**Fig 4. (A)** Changes in hydroperoxy- and hydroxy-arachidonic acid (AA) species, including 15-HpETE and 15-HETE, following IL-13 with AA supplementation in HAECs. **(B)** Changes in total hydroperoxy- (PL-OOH) and hydroxy-phospholipids (PL-OH) following IL-13 and ALOX15/15LO1 KD compared to control/scramble in HAECs. **(C)** Changes in intracellular GSH.

## 1 Supplemental Figures.

2 **Fig. 1.** GSH and GSSG levels and GSH:GSSG measured by enzymatic method correlated  
3 strongly with high-performance liquid chromatography (HPLC) measurements (n=17).

4 **Fig. 2. (A)** Representative western blots showing time course of SLC7A11 protein expression  
5 in response IL-13 stimulation *in vitro*. **(B)** Representative western blots showing the  
6 inconsistent impact of ALOX15 siRNA knockdown on SLC7A11. **(C)** Densitometric analysis  
7 of the fold changes.

8 **Fig 3.** Effect of BLX2477 on oxidation of free eicosanotetraenoic acid (ETE) and stearoyl-  
9 sn-1-eicosatetraenoyl-sn-1-phosphatidylethanolamine (SA-sn-1-ETE-sn-2-PE) by 15-LOX-1  
10 in the absence and in the presence of PEBP1.

11 **(A)** Concentration dependent inhibition of 15LO1 activity by BLX2477 in the presence of ETE  
12 (open circles) or in the presence of SA-sn-2-ETE-sn-2-PE (closed circles) (left panel). The  
13 data are presented as % of control. 100% of 15LO1 activity in the absence of BLX2477 was  
14 used as the control (n=5-7).  $IC_{50}$  values of 15LO1 for BLX2477.  $IC_{50}$  values were calculated  
15 using GraphPad Prism (GraphPad Software, Inc.)

16 **(B)** 15LO1 oxidation of ETE results in the formation of two oxidized products 15-OOH-ETE  
17 and 12-OOH-ETE. Base peak profile of oxygenated ETE formed during 15LO1-driven  
18 reaction (middle panel).  $MS^2$  spectrum and structural formulas showing the fragments formed

19 during the analysis of molecular ions with  $m/z$  317.2 corresponding to 15-OOH-ETE without  
20 water (left panel) and 12-OOH-ETE without water (right panel).

21 Experimental conditions: ETE or SA-sn-1-ETE-sn-2-PE were integrated into OA-sn-1-OA-sn-  
22 2-PC(100 mM, at ratio of 1:1) liposomes and incubated with 15LO1 (0.4mM) for 2.5 and 5  
23 min at 37°C. Reaction was started by the addition of 3  $\mu$ M 13 HpODE. At the end of incubation  
24 lipids were extracted and analyzed by LC/MS.

25

26 **Fig 4. (A)** Changes in hydroperoxy- and hydroxy-arachidonic acid (AA) species, including 15-  
27 HpETE and 15-HETE, following IL-13 with AA supplementation in HAECs. **(B)** Changes in  
28 total hydroperoxy- (PL-OOH) and hydroxy-phospholipids (PL-OH) following IL-13 and  
29 ALOX15/15LO1 KD compared to control/scramble in HAECs. **(C)** Changes in intracellular  
30 GSH.

31

32 **Supplemental Table 1. Characteristics of fresh epithelial cell subset**

|                                             | HC (n = 11) | M/M (n = 4)   | SA (n = 11)   | P value |
|---------------------------------------------|-------------|---------------|---------------|---------|
| <b>Age (years)</b>                          | 44 ± 14     | 35 ± 18       | 52 ± 11       | 0.189   |
| <b>Female/male</b>                          | 8/3         | 2/2           | 7/4           | 0.706   |
| <b>BMI (kg/m<sup>2</sup>)</b>               | 27 ± 4      | 28 ± 2        | 30 ± 7        | 0.478   |
| <b>History of exacerbation*,<br/>yes/no</b> | NA          | 1/3           | 6/5           | 0.310   |
| <b>Inhaled corticosteroids,<br/>yes/no</b>  | NA          | 1/3           | 11/0          | 0.001   |
| <b>ACQ</b>                                  | NA          | 0.6 (0.2-1.2) | 1.7 (1.3-3.0) | 0.023   |
| <b>AQLQ</b>                                 | NA          | 6.3 (5.9-6.7) | 5.2 (3.9-5.8) | 0.013   |
| <b>FeNO (ppb)</b>                           | 11 (9-17)   | 31 (14-47)    | 37 (17-45)    | 0.011   |
| <b>FEV<sub>1</sub> (% predicted)</b>        | 102 ± 13    | 98 ± 17       | 65 ± 25       | <0.001  |

33 Data as means ± SDs



- 34 p values by ANOVA, Mann-Whitney, Kruskal-Wallis, or  $\chi^2$  tests
- 35 Exacerbation\*, self-reported use of systemic corticosteroid  $\geq 3$  days in past 12 months

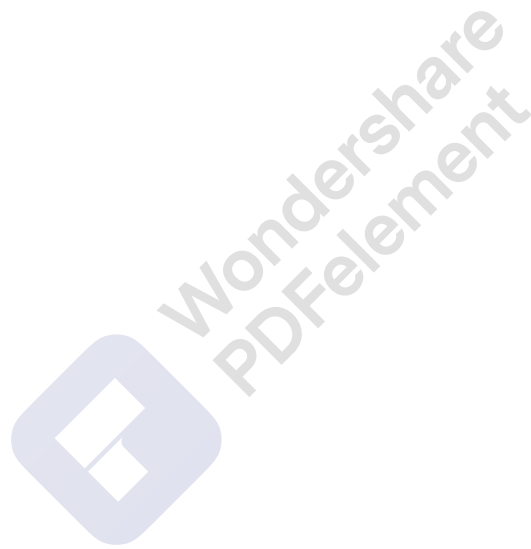

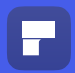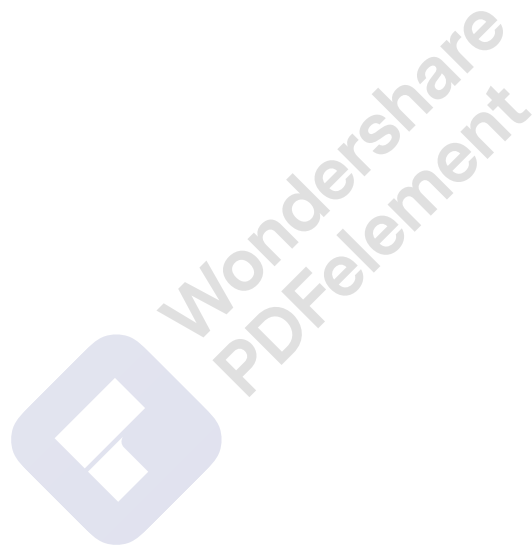

37 **Supplemental Table 2. Relationships between extracellular (BAL fluid) and intracellular**38 **GSH pathways in asthma and HCs**

|                               | <u>BAL fluid</u>                |                                    |                                 |
|-------------------------------|---------------------------------|------------------------------------|---------------------------------|
|                               | GSH ( $\mu\text{M}$ )           | GSSG ( $\mu\text{M}$ )             | GSH:GSSG                        |
| <u>Intracellular</u>          |                                 |                                    |                                 |
| <b>GSH (nmol/mg protein)</b>  | <b>r=0.41</b><br><b>p=0.037</b> | <b>r=-0.29</b><br><b>p=0.156</b>   | <b>r=0.58</b><br><b>p=0.002</b> |
| <b>GSSG (nmol/mg protein)</b> | <b>r=0.26</b><br><b>p=0.191</b> | <b>r=-0.09</b><br><b>p = 0.645</b> | <b>r=0.33</b><br><b>p=0.104</b> |
| <b>GSH:GSSG</b>               | <b>r=0.13</b><br><b>p=0.517</b> | <b>r= -0.19</b><br><b>p= 0.352</b> | <b>r=0.24</b><br><b>p=0.234</b> |

39

40

41

42

43

44

45

46

47

48

49

50

51

52 **Supplemental Table 3. Non-parametric correlations for BAL eosinophils (absolute, %**

53 **BAL cells) and GSH, GSSG and GSH:GSSG**

54

55 Eosinophils

|                   | Absolute eosinophil<br>numbers | % BAL Cells          |
|-------------------|--------------------------------|----------------------|
| <i>BAL Fluid:</i> |                                |                      |
| <b>GSH</b>        | rho=0.02<br>p=0.877            | rho=-0.08<br>p=0.417 |
| <b>GSSG</b>       | rho=-0.01<br>p=0.938           | rho=0.05<br>p=0.644  |
| <b>GSH:GSSG</b>   | rho=-0.05<br>p=0.610           | rho=-0.18<br>p=0.078 |

*Intra-epithelial:*

|             |                      |                      |
|-------------|----------------------|----------------------|
| <b>GSH</b>  | rho=-0.25<br>p=0.227 | rho=-0.33<br>p=0.102 |
| <b>GSSG</b> | rho=-0.26<br>p=0.199 | rho=-0.29<br>p=0.148 |

**GSH:GSSG**

rho=-0.07

rho=-0.14

p=0.730

p=0.482

56

57

58 **Supplemental Table 4. Non-parametric correlations of inflammatory cells (% BAL cells)**59 **versus BAL fluid and intracellular/intra-epithelial GSH, GSSG, and GSH:GSSG.**

60

61 Other Inflammatory Cells

|                   | <b>Neutrophils</b>   | <b>Macrophages</b>    | <b>Lymphocytes</b>    |
|-------------------|----------------------|-----------------------|-----------------------|
|                   | <b>(% BAL cells)</b> | <b>(% BAL cells )</b> | <b>(% BAL cells )</b> |
| <i>BAL Fluid:</i> |                      |                       |                       |
| <b>GSH</b>        | rho=-0.06            | rho=0.01              | rho=-0.01             |
|                   | p=0.586              | p=0.989               | p=0.914               |
| <b>GSSG</b>       | rho=0.16             | rho=-0.15             | rho=0.07              |
|                   | p=0.147              | p=0.156               | p=0.542               |
| <b>GSH:GSSG</b>   | rho=-0.19            | rho=0.14              | rho=-0.09             |
|                   | p=0.089              | p=0.206               | p=0.431               |

---

*Intra-epithelial:*

|                 |           |          |           |
|-----------------|-----------|----------|-----------|
| <b>GSH</b>      | rho=-0.07 | rho=0.01 | rho=0.13  |
|                 | p=0.725   | p=0.985  | p=0.527   |
| <b>GSSG</b>     | rho=0.15  | rho=0.17 | rho=-0.12 |
|                 | p=0.481   | p=0.403  | p=0.557   |
| <b>GSH:GSSG</b> | rho=-0.32 | rho=0.01 | rho=0.07  |
|                 | p=0.117   | p=0.956  | p=0.744   |

---

62

63

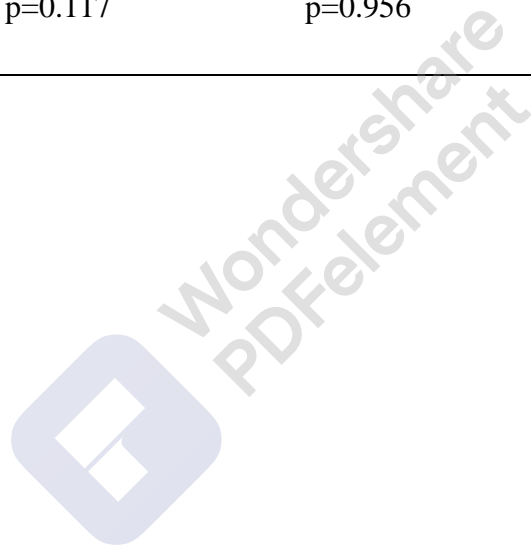

64 **Supplemental Table 5. Correlation of T2 signature genes and ALOX15 expression.**

---

|                          | <b>ALOX15 expression</b> |
|--------------------------|--------------------------|
| <b>CCL26 expression</b>  | <b>r=0.58</b>            |
|                          | <b>p&lt;0.001</b>        |
| <b>MUC5AC expression</b> | <b>r=0.41</b>            |
|                          | <b>p&lt;0.001</b>        |
| <b>NOS2 expression</b>   | <b>r=0.67</b>            |
|                          | <b>p&lt;0.001</b>        |
| <b>POSTN expression</b>  | <b>r=0.56</b>            |
|                          | <b>p&lt;0.001</b>        |

---

65 **Bold p-values pass Bonferonni Correction**

66
